# Supplementary material for: The proton conduction behavior of two 1D open-framework metal phosphates with similar crystal structures and different hydrogen bond networks
Source: Royal Society of Chemistry journal article supplement (doi:10.1039/d3ra01130e), 2023-01-01
Supplement: d3ra01130e1.pdf [file d3ra01130e1.pdf]

**The proton conduction behavior of two 1D open-framework metal phosphates with similar crystal structure and different hydrogen bond network**

Kai-ming Zhang<sup>a,c</sup>, Min-fang Ji<sup>b</sup>, Xue-Yi Zhou<sup>b</sup>, Fang Xuan<sup>b</sup>, Bo-yuan Duan<sup>a</sup>, Yuan Yuan<sup>a</sup>, Guang-xiang Liu<sup>b\*</sup>, Hai-bao Duan<sup>b\*</sup> and Hai-rong Zhao<sup>b\*</sup>

<sup>a</sup> Department of material science and engineering, Nanjing Institute of Technology, Nanjing 211167, P. R. China.

<sup>b</sup> School of Environmental science, Nanjing Xiaozhuang University, Nanjing 210009, P. R. E-mail: hairong\_zhao111@163.com (HRZ); Tel: +86 25 13914700426.

<sup>c</sup> Jiangsu Key Laboratory of Advanced Structural Materials and Application Technology, 1 Hongjing Road, Nanjing 211167, P. R. China.

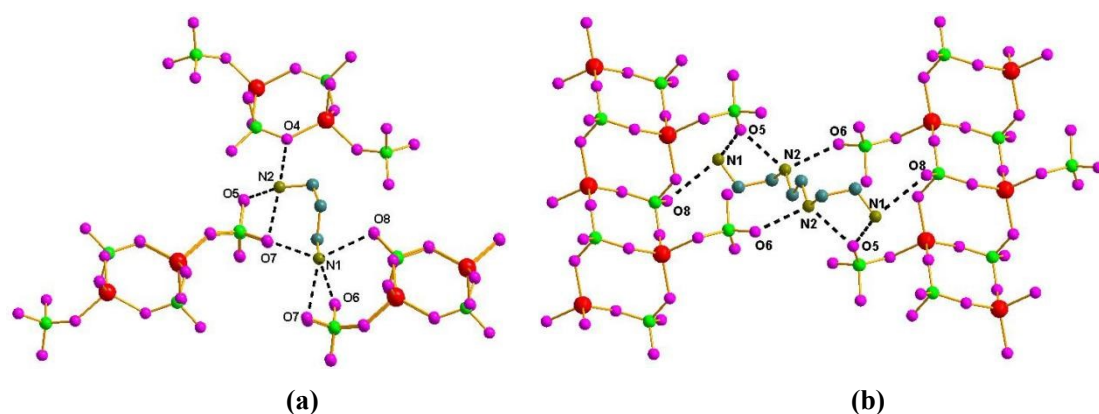

**Fig.S1** H-bond interactions between the guests and the inorganic  $[\text{Zn}(\text{HPO}_4)_2]_\infty$  chains in the crystal of (a) **1** and (b) **2**.

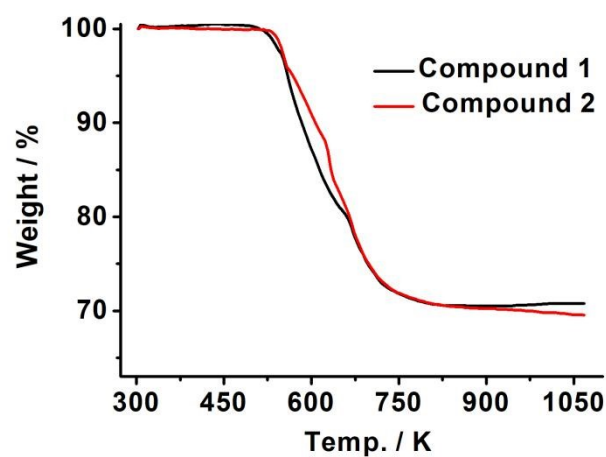

**Fig. S2** TG plots of compound **1** and **2**.

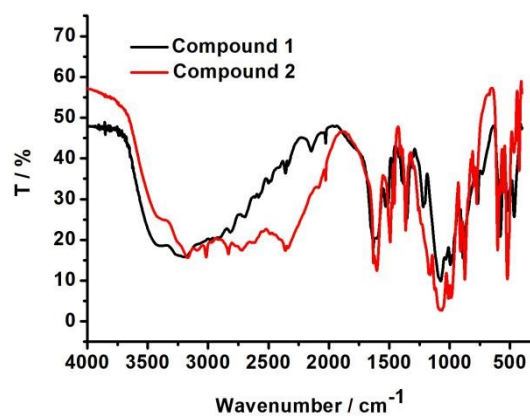

**Fig.S3** The FTIR curves of **1** and **2**.

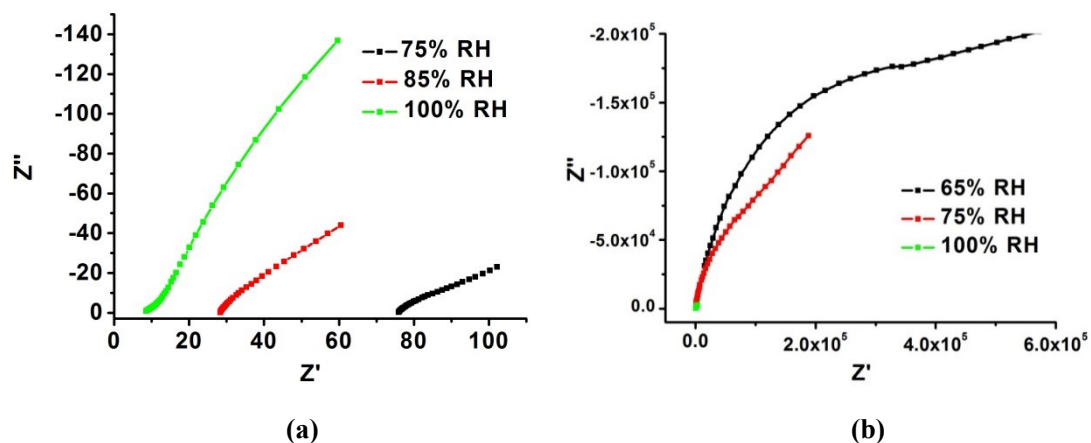

Fig.S4 Nyquist plot of (a) 1 and (b) 2 in the range of 75%-100% RH at 303 K.

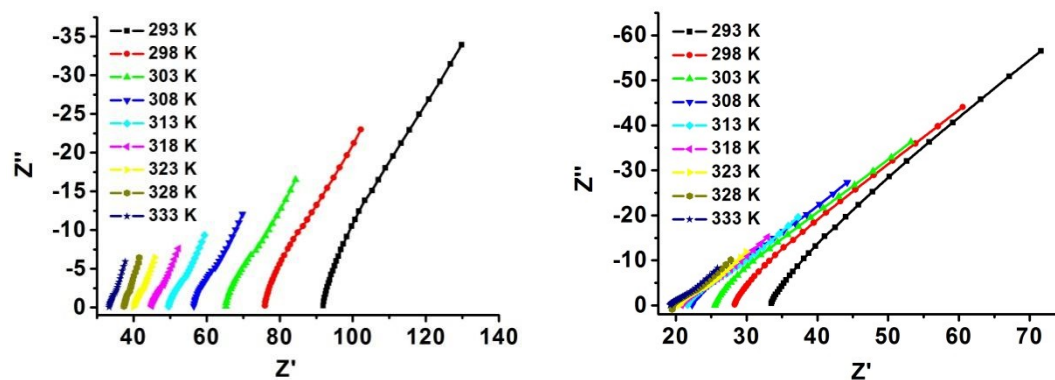

Fig.S5 Temperature-dependent of Nyquist plots for 1 (a) 75% RH and (b) 85% RH.

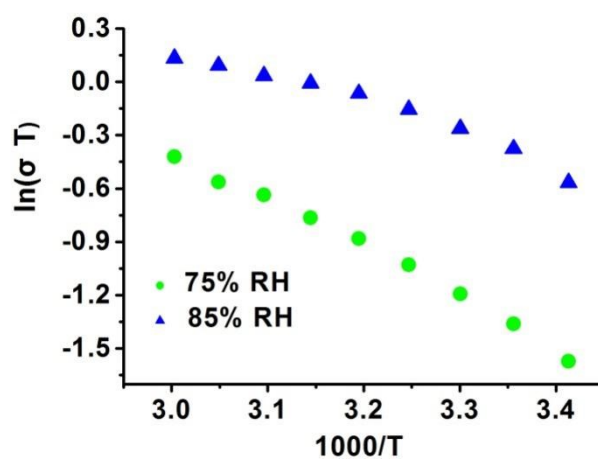

Fig.S6 The corresponding conductivity in the form of  $\ln(\sigma T)$  vs.  $1000/T$  at 75%RH and 85%RH for 1.
